# Supplementary material for: Circulating Levels of Hydrogen Sulfide (H2S) in Patients with Age-Related Diseases: A Systematic Review and Meta-Analysis
Source: MDPI journal article supplement (doi:10.3390/biom13071023), 2023-06-21
Supplement: s1 [file s1]

## S1. Search strategy

### Medline and CENTRAL:

(H<sub>2</sub>S OR hydrogen sulfide OR hydrogen sulphide) AND (plasma OR plasma level\* OR blood OR blood level\* OR serum OR serum level\* OR plasma concentration\* OR blood concentration\* OR serum concentration\* OR concentration\* OR availability OR bioavailability OR production) AND (ageing OR age-related disorder\* OR age-related disease\* OR hypertension OR blood pressure OR angina OR angina pectoris OR myocardial infarction OR heart failure OR coronary artery disease OR acute coronary syndrome OR chronic coronary syndrome OR arrhythmias OR cardiovascular disorder\* OR atherosclerosis OR hypercholesterolemia OR diabetes OR type 2 diabetes OR diabetes mellitus OR type 2 diabetes mellitus OR metabolic syndrome OR metabolic disorder\* OR osteoporosis OR neurodegenerative disease\* OR neurodegenerative disorder\* OR dementia OR Alzheimer OR Alzheimer's disease OR Parkinson OR Parkinson's disease OR glaucoma OR asthma OR COPD OR chronic obstructive pulmonary disease OR nephropathy OR chronic kidney disease OR cancer OR decline)

### Scopus:

(TITLE-ABS-KEY (H<sub>2</sub>S OR (hydrogen AND sulfide) OR (hydrogen AND sulphide)) AND TITLE-ABS-KEY (plasma OR (plasma AND level\*) OR blood OR (blood AND level\*) OR serum OR (serum AND level\*) OR (plasma AND concentration\*) OR (blood AND concentration\*) OR (serum AND concentration\*) OR concentration\* OR availability OR bioavailability OR production) AND TITLE-ABS-KEY (ageing OR (age-related AND disorder\*) OR (age-related AND disease\*) OR hypertension OR (blood AND pressure) OR angina OR (angina AND pectoris) OR (myocardial AND infarction) OR (heart AND failure) OR (coronary AND artery AND disease) OR (acute AND coronary AND syndrome) OR (chronic AND coronary AND syndrome) OR arrhythmias OR (cardiovascular AND disorder\*) OR atherosclerosis OR hypercholesterolemia OR diabetes OR (type AND 2 AND diabetes) OR (diabetes AND mellitus) OR (type AND 2 AND diabetes AND mellitus) OR (metabolic AND syndrome) OR (metabolic AND disorder\*) OR osteoporosis OR (neurodegenerative AND disease\*) OR (neurodegenerative AND disorder\*) OR dementia OR Alzheimer OR (Alzheimer's AND disease) OR Parkinson OR (Parkinson's AND disease) OR glaucoma OR asthma OR COPD OR (chronic AND obstructive AND pulmonary AND disease) OR nephropathy OR (chronic AND kidney AND disease) OR cancer OR decline))

### Embase:

#44. #9 AND #42 AND #43

#43. 'hydrogen sulfide'

#42. #10 OR #11 OR #12 OR #13 OR #14 OR #15 OR #16 OR

#17 OR #18 OR #19 OR #20 OR #21 OR #22 OR #23 OR

#24 OR #25 OR #26 OR #27 OR #28 OR #29 OR #30 OR

#31 OR #32 OR #33 OR #34 OR #35 OR #36 OR #37 OR

#38 OR #39 OR #40 OR #41

#41. 'deterioration'

#40. 'malignant neoplasm'

#39. 'chronic kidney failure'

#38. 'kidney disease'

#37. 'chronic obstructive lung disease'

#36. 'asthma'

#35. 'glaucoma'

#34. 'parkinson disease'

#33. 'alzheimer disease'

#32. 'dementia'

#31. neurodegenerative AND disorder\*

#30. 'degenerative disease'

#29. 'osteoporosis'

#28. 'metabolic disorder'

#27. 'metabolic syndrome x'

#26. 'non insulin dependent diabetes mellitus'

#25. 'diabetes mellitus'

#24. 'hypercholesterolemia'

#23. 'atherosclerosis'

#22. 'cardiovascular disease'

#21. 'arrythmia'

#20. 'chronic coronary syndrome'

#19. 'acute coronary syndrome'

#18. 'coronary artery disease'

#17. 'heart failure'

- #16. 'heart infarction'
- #15. 'angina pectoris'
- #14. 'blood pressure'
- #13. 'hypertension'
- #12. 'geriatric disorder'
- #11. age AND related AND disease\*
- #10. 'aging'
- #9. #1 OR #2 OR #3 OR #4 OR #5 OR #6 OR #7 OR #8
- #8. 'production'
- #7. 'bioavailability'
- #6. 'availability'
- #5. 'concentration (parameter)'
- #4. 'serum'
- #3. blood
- #2. 'blood level'
- #1. 'plasma'

**Table S1.** Characteristics of the included studies, details of H<sub>2</sub>S levels measurement and main results. Symbols: ↑ indicates an increase in circulating levels of H<sub>2</sub>S in patients with disease *vs* the control group, ↓ indicates a decrease in levels of H<sub>2</sub>S while = indicates that there are no differences in circulating levels of H<sub>2</sub>S between the two groups. List of abbreviations: ADRDs: Alzheimer’s disease and related dementias; AE-COPD: acute exacerbation of chronic obstructive pulmonary disease; AMI: acute myocardial infarction; CAD: coronary artery disease; CHD: chronic haemodialysis; CKD: chronic kidney disease; COPD: chronic obstructive pulmonary disease; CRC: colorectal cancer; GC: gas chromatography;

HCC: hepatic cancer; HPLC: high performance liquid chromatography; LC-MS/MS: liquid chromatography-tandem mass spectrometry; NPDR: non-proliferative diabetic retinopathy; PAD: peripheral artery disease; PDR: non-proliferative diabetic retinopathy; STEMI: ST-elevation myocardial infarction; T2D: type 2 diabetes.

| Study name      | Study design    | Study population                                                                                 | Controls               | n° patients/<br>n° controls | Men, %<br>(patients/<br>controls) | Mean age ± SD<br>or range, years<br>(patients/<br>controls) | Biological<br>sample | Method of<br>measurement                               | H <sub>2</sub> S levels in<br>patients<br>with disease<br><i>vs</i> control | Included<br>in the<br>meta-<br>analysis |
|-----------------|-----------------|--------------------------------------------------------------------------------------------------|------------------------|-----------------------------|-----------------------------------|-------------------------------------------------------------|----------------------|--------------------------------------------------------|-----------------------------------------------------------------------------|-----------------------------------------|
| Ali, 2016       | Case-control    | Patients with acute STEMI or unstable angina pectoris                                            | Healthy patients       | 60/15                       | 53.3/46.7                         | 56.0 ± 12.9/<br>57.0 ± 13.2                                 | Serum                | ELISA kit                                              | ↑                                                                           | No                                      |
| Alyan, 2019     | Case-control    | Patients with AMI (STEMI and non-STEMI)                                                          | Healthy subjects       | 75/50                       | 81.3/82.0                         | 51.4 ± 8.7/<br>46.1 ± 10.7                                  | Plasma               | Fluorescent probe DNS-Az and H <sub>2</sub> S Analyzer | ↑                                                                           | Yes                                     |
| Bahadoran, 2022 | Cross-sectional | Patients with T2D                                                                                | Patients without T2D   | 111/511                     | 53.2/46.6                         | 56.1 ± 12.5/<br>41.0 ± 12.6                                 | Serum                | Spectrophotometric method (Methylene blue)             | ↓                                                                           | Yes                                     |
| Chen, 2005      | Case-control    | Patients with stable COPD or AE-COPD                                                             | Healthy subjects       | 64/13                       | 70.3/46.2                         | 70.3 ± 8.6/<br>58.7 ± 8.3                                   | Serum                | Sulfide-sensitive electrode                            | ↑                                                                           | No                                      |
| Disbrow, 2021   | Case-control    | Patients with ADRDs                                                                              | Patients without ADRDs | 15/42                       | 13.3/14.2                         | 68.5 ± 5.93/<br>67.5 ± 9.6                                  | Plasma               | HPLC and derivatization with monobromobimane           | =                                                                           | No                                      |
| Feng, 2017      | Case-control    | Hypertensive patients                                                                            | Healthy volunteers     | 30/22                       | -                                 | -                                                           | Serum                | Fluorescent probe C7Az                                 | ↓                                                                           | Yes                                     |
| Gao, 2015       | Cross-sectional | Patients with CAD (i.e., stable angina pectoris, unstable angina pectoris, non-STEMI, and STEMI) | Healthy subjects       | 63/11                       | 75.0/27.3                         | 71.9 ± 5.1/<br>68.7 ± 8.9                                   | Plasma               | Spectrophotometric method (Methylene blue)             | ↓                                                                           | Yes                                     |

|                                    |                 |                                                                                           |                                           |        |           |                         |        |                                            |   |     |
|------------------------------------|-----------------|-------------------------------------------------------------------------------------------|-------------------------------------------|--------|-----------|-------------------------|--------|--------------------------------------------|---|-----|
| Grabowska-Polanowska, 2017_CKD     | Case-control    | Patients with CKD                                                                         | Healthy volunteers                        | 10/10  | -         | 48.5 (26-84)/36 (24-60) | Plasma | Spectrophotometric method (Methylene blue) | ↑ | Yes |
| Grabowska-Polanowska, 2017_CKD+T2D | Case-control    | Patients with CKD and T2D                                                                 | Healthy volunteers                        | 10/10  | -         | 60 (35-85)/36 (24-60)   | Plasma | Spectrophotometric method (Methylene blue) | ↑ | Yes |
| Guo, 2017                          | Case-control    | Patients with diabetic cardiomyopathy                                                     | Healthy controls                          | 32/-   | 75.0/-    | -                       | Plasma | Sulphur ion-selective electrode            | ↓ | No  |
| Hao, 2021                          | Cross-sectional | Patients with osteopenia or osteoporosis                                                  | Patients with normal bone mineral density | 25/75  | 48.0/77.3 | 64.1 ± 2.2/50.2 ± 1.1   | Serum  | ELISA kit                                  | ↑ | No  |
| Jain, 2010                         | Case-control    | Patients with T2D                                                                         | Normal volunteers                         | 63/14  | -         | 52.0 ± 3.0/54.0 ± 7.0   | Blood  | Spectrophotometric method (Methylene blue) | ↓ | No  |
| Jain, 2013                         | Case-control    | Patients with T2D                                                                         | Healthy controls                          | 76/36  | -         | 47.2 ± 1.6/42.7 ± 3.0   | Blood  | Spectrophotometric method (Methylene blue) | ↓ | No  |
| Kuang, 2018                        | Case-control    | Patients with non-dialysis CKD                                                            | Healthy individuals                       | 157/37 | 50.3/48.6 | 49.5 ± 14.8/50.9 ± 6.4  | Plasma | Spectrophotometric method (Methylene blue) | ↓ | Yes |
| Li, 2014_CHD                       | Case-control    | Patients with CHD                                                                         | Normal control group                      | 36/30  | 55.6/50.0 | 48.3 ± 11.5/-           | Plasma | Sulfide sensitive electrode                | ↓ | Yes |
| Li, 2014_CHD+T2D                   | Case-control    | Patients with CHD and diabetic nephropathy                                                | Normal control group                      | 32/30  | 53.1/50.0 | 47.8 ± 12.5/-           | Plasma | Sulfide sensitive electrode                | ↓ | Yes |
| Lin, 2020                          | Cross-sectional | Patients with ocular hypertension, normal tension glaucoma or primary open-angle glaucoma | Normal subjects                           | 114/78 | 50.9/46.2 | 58.7 ± 12.1/60.5 ± 1.5  | Plasma | Spectrophotometric method (Methylene blue) | ↓ | Yes |

|                    |                 |                                                                     |                      |        |             |                                |        |                                            |   |     |
|--------------------|-----------------|---------------------------------------------------------------------|----------------------|--------|-------------|--------------------------------|--------|--------------------------------------------|---|-----|
| Longchamp, 2021    | Case-control    | Patients with vascular disease who underwent carotid endarterectomy | Healthy patients     | 115/20 | 63.0/65.0   | $69.0 \pm 9.0 / 68.0 \pm 2.3$  | Plasma | Lead acetate method                        | ↓ | Yes |
| Pan, 2015          | Case-control    | Patients with essential hypertension                                | Healthy volunteers   | 10/16  | 62.5/62.5   | $56.9 \pm 4.0 / 55.5 \pm 3.6$  | Plasma | Spectrophotometric method (Methylene blue) | ↓ | Yes |
| Perna, 2009        | Case-control    | Haemodialysis patients (end stage renal disease)                    | Healthy controls     | 65/31  | -           | $63 (39-69) / 53 (29-59)$      | Plasma | Spectrophotometric method (Methylene blue) | ↓ | Yes |
| Peter, 2013        | Cross-sectional | Patients with any vascular disease (CAD or PAD)                     | Healthy volunteers   | 219/53 | 60.7/28.3   | $56.5 \pm 8.5 / 53.0 \pm 8.6$  | Plasma | Reversed phase HPLC                        | ↑ | Yes |
| Polhemus, 2015     | Case-control    | Patients with heart failure                                         | Healthy subjects     | 12/8   | 100.0/100.0 | $57.2 \pm 13.5 / 27.4 \pm 1.7$ | Plasma | GC chemiluminescence                       | = | No  |
| Qiu, 2018          | Case-control    | Patients with T2D                                                   | Patients without T2D | 101/20 | 61.4/40.0   | $61.4 \pm 14.2 / 61.9 \pm 9.9$ | Serum  | LC-MS/MS                                   | ↓ | Yes |
| Ran, 2014_T2D      | Case-control    | Patients with T2D                                                   | Normal controls      | 25/30  | -           | $61.9 \pm 2.0 / 57.8 \pm 1.8$  | Plasma | Spectrophotometric method (Methylene blue) | ↓ | Yes |
| Ran, 2014_T2D+NPDR | Case-control    | Patients with T2D and NPDR                                          | Normal controls      | 25/30  | -           | $62.7 \pm 1.9 / 57.8 \pm 1.8$  | Plasma | Spectrophotometric method (Methylene blue) | ↑ | Yes |
| Ran, 2014_T2D+PDR  | Case-control    | Patients with T2D and PDR                                           | Normal controls      | 25/30  | -           | $62.2 \pm 2.3 / 57.8 \pm 1.8$  | Plasma | Spectrophotometric method (Methylene blue) | ↑ | Yes |
| Saito, 2014_COPD   | Cross-sectional | Patients with stable COPD                                           | Healthy subjects     | 64/35  | 51.6/54.3   | $69.1 \pm 8.6 / 51.3 \pm 8.5$  | Serum  | Sulfide sensitive electrode                | ↑ | Yes |

|                           |                 |                                                                       |                          |         |             |                             |        |                                            |   |     |
|---------------------------|-----------------|-----------------------------------------------------------------------|--------------------------|---------|-------------|-----------------------------|--------|--------------------------------------------|---|-----|
| Saito, 2014_AE-COPD       | Cross-sectional | Patients with AE-COPD                                                 | Healthy subjects         | 29/35   | 62.1/54.3   | 74.4 ± 9.1/<br>51.3 ± 8.5   | Serum  | Sulfide sensitive electrode                | ↓ | Yes |
| Suzuki, 2017              | Case-control    | Patients with T2D                                                     | Patients without T2D     | 154/66  | 43.5/37.9   | 61.7 ± 13.6/<br>52.5 ± 14.8 | Plasma | Spectrophotometric method (Methylene blue) | ↓ | Yes |
| Wang, 2014                | Case-control    | Patients with cirrhosis-induced portal hypertension                   | Healthy individuals      | 200/100 | 70.0/50.0   | 44.0 ± 14.0/<br>47.0 ± 13.0 | Plasma | Spectrophotometric method (Methylene blue) | ↓ | Yes |
| Wang, 2015                | Case-control    | Patients with CHD, with or without uremic accelerated atherosclerosis | Healthy people           | 60/30   | 61.7/50.0   | 47.2 ± 12.1/-               | Plasma | Sulfide sensitive electrode                | ↓ | No  |
| Whiteman, 2010_T2D        | Case-control    | Patients with T2D                                                     | Lean, healthy volunteers | 11/11   | 100.0/100.0 | 61.0 ± 8.4/<br>54.8 ± 16.5  | Plasma | Spectrophotometric method (Methylene blue) | ↓ | Yes |
| Whiteman, 2010_overweight | Case-control    | Overweight patients                                                   | Lean, healthy volunteers | 16/11   | 100.0/100.0 | 65.0 ± 6.1/<br>54.8 ± 16.5  | Plasma | Spectrophotometric method (Methylene blue) | ↓ | Yes |
| Wu, 2020_HCC              | Case-control    | Patients with HCC                                                     | Healthy volunteers       | 10/10   | -           | -                           | Blood  | Luminescent probe                          | ↑ | Yes |
| Wu, 2020_CRC              | Case-control    | Patients with CRC                                                     | Healthy volunteers       | 10/10   | -           | -                           | Blood  | Luminescent probe                          | ↑ | Yes |
| Xiao, 2018                | Cross-sectional | Patients with hypertension                                            | Normotensive patients    | 15/22   | 67.0/68.0   | 64.0 ± 11.6/<br>59.0 ± 9.4  | Plasma | LC-MS/MS                                   | ↓ | Yes |
| Zheng, 2011               | Case-control    | Patients with essential hypertension                                  | Normotensive patients    | 62/64   | 72.6/43.8   | 47.6 ± 9.2/<br>46.7 ± 10.1  | Serum  | Sulfide sensitive electrode                | ↑ | Yes |
| Zheng, 2016               | Case-control    | Patients with multiple myeloma                                        | Healthy subjects         | 20/15   | 55.0/-      | 57 (37-70)/-                | Plasma | ELISA kit                                  | ↑ | No  |

**Table S2.** Risk of bias of case-control studies.

| Study name                 | 1. Were the groups comparable other than the presence of disease in cases or the absence of disease in controls? | 2. Were controls and patients with disease matched appropriately? | 3. Were the criteria for inclusion/exclusion in the sample clearly defined? | 4. Were the study subjects and the setting described in detail? | 5. Was the sample size enough in both control and disease groups? | 6. Was the sample frame taken from an appropriate population base so that it closely represented the target/reference population under investigation? | 7. Were confounding factors identified? | 8. Were strategies to deal with confounding factors stated? | 9. Were the outcomes measured in a valid and reliable way? | 10. Was appropriate statistical analysis used? | Total score |
|----------------------------|------------------------------------------------------------------------------------------------------------------|-------------------------------------------------------------------|-----------------------------------------------------------------------------|-----------------------------------------------------------------|-------------------------------------------------------------------|-------------------------------------------------------------------------------------------------------------------------------------------------------|-----------------------------------------|-------------------------------------------------------------|------------------------------------------------------------|------------------------------------------------|-------------|
| Ali, 2016                  | 0                                                                                                                | 1                                                                 | 1                                                                           | 1                                                               | 0                                                                 | 0                                                                                                                                                     | 0                                       | 0                                                           | 1                                                          | 1                                              | 5/10        |
| Alyan, 2019                | 1                                                                                                                | 0                                                                 | 0                                                                           | 1                                                               | 1                                                                 | 0                                                                                                                                                     | 0                                       | 0                                                           | 0                                                          | 1                                              | 4/10        |
| Chen, 2005                 | 0                                                                                                                | 1                                                                 | 0                                                                           | 1                                                               | 0                                                                 | 1                                                                                                                                                     | 0                                       | 0                                                           | 1                                                          | 1                                              | 5/10        |
| Disbrow, 2021              | 1                                                                                                                | 1                                                                 | 0                                                                           | 1                                                               | 0                                                                 | 0                                                                                                                                                     | 0                                       | 0                                                           | 1                                                          | 1                                              | 5/10        |
| Feng, 2017                 | 0                                                                                                                | 1                                                                 | 0                                                                           | 1                                                               | 1                                                                 | 0                                                                                                                                                     | 0                                       | 0                                                           | 0                                                          | 1                                              | 4/10        |
| Grabowska-Polanowska, 2017 | 0                                                                                                                | 0                                                                 | 0                                                                           | 1                                                               | 0                                                                 | 1                                                                                                                                                     | 0                                       | 0                                                           | 0                                                          | 1                                              | 3/10        |
| Guo, 2017                  | 0                                                                                                                | 1                                                                 | 1                                                                           | 1                                                               | 0                                                                 | 0                                                                                                                                                     | 0                                       | 0                                                           | 1                                                          | 1                                              | 5/10        |



|                    |   |   |   |   |   |   |   |   |   |   |       |
|--------------------|---|---|---|---|---|---|---|---|---|---|-------|
| Hao, 2021          | 0 | 1 | 1 | 1 | 1 | 0 | 0 | 1 | 1 | 1 | 7/10  |
| Jain, 2010         | 0 | 1 | 0 | 0 | 0 | 0 | 0 | 0 | 1 | 1 | 3/10  |
| Jain, 2013         | 0 | 1 | 1 | 1 | 1 | 0 | 0 | 0 | 1 | 1 | 6/10  |
| Kuang, 2018        | 0 | 1 | 1 | 1 | 1 | 1 | 0 | 0 | 1 | 1 | 7/10  |
| Li, 2014           | 1 | 1 | 1 | 1 | 1 | 1 | 1 | 1 | 1 | 1 | 10/10 |
| Longchamp,<br>2021 | 0 | 1 | 0 | 1 | 1 | 0 | 0 | 0 | 0 | 1 | 4/10  |
| Pan, 2015          | 0 | 1 | 1 | 1 | 0 | 1 | 0 | 0 | 1 | 1 | 6/10  |
| Perna, 2009        | 0 | 0 | 1 | 1 | 1 | 1 | 1 | 1 | 1 | 1 | 8/10  |
| Polhemus,<br>2015  | 0 | 0 | 1 | 1 | 0 | 0 | 0 | 0 | 1 | 1 | 4/10  |
| Qiu, 2018          | 1 | 1 | 1 | 1 | 1 | 1 | 1 | 1 | 1 | 1 | 10/10 |
| Ran, 2014          | 1 | 0 | 0 | 1 | 1 | 1 | 0 | 0 | 1 | 1 | 6/10  |

|                   |   |   |   |   |   |   |   |   |   |   |      |
|-------------------|---|---|---|---|---|---|---|---|---|---|------|
| Suzuki, 2017      | 0 | 0 | 1 | 1 | 1 | 1 | 0 | 0 | 1 | 1 | 5/10 |
| Wang, 2014        | 0 | 0 | 1 | 1 | 1 | 1 | 1 | 1 | 1 | 1 | 8/10 |
| Wang, 2015        | 0 | 1 | 1 | 1 | 1 | 1 | 0 | 0 | 1 | 1 | 7/10 |
| Whiteman,<br>2010 | 0 | 1 | 1 | 1 | 0 | 0 | 0 | 0 | 1 | 1 | 5/10 |
| Wu, 2020          | 0 | 0 | 0 | 1 | 0 | 0 | 0 | 0 | 0 | 1 | 2/10 |
| Zheng, 2011       | 0 | 1 | 1 | 1 | 1 | 1 | 0 | 0 | 1 | 1 | 7/10 |
| Zheng, 2016       | 0 | 1 | 0 | 1 | 0 | 0 | 0 | 0 | 1 | 1 | 4/10 |

**Table S3.** Risk of bias of cross-sectional studies.

| Study name      | 1. Were the criteria for inclusion/exclusion in the sample clearly defined? | 2. Were the study subjects and the setting described in detail? | 3. Was the sample size enough in both control and disease groups? | 4. Were objective, standard criteria used for measurement of the condition (disease)? | 5. Were confounding factors identified? | 6. Were strategies to deal with confounding factors stated? | 7. Were the outcomes measured in a valid and reliable way? | 8. Was appropriate statistical analysis used? | Total score |
|-----------------|-----------------------------------------------------------------------------|-----------------------------------------------------------------|-------------------------------------------------------------------|---------------------------------------------------------------------------------------|-----------------------------------------|-------------------------------------------------------------|------------------------------------------------------------|-----------------------------------------------|-------------|
| Bahadoran, 2022 | 1                                                                           | 1                                                               | 1                                                                 | 1                                                                                     | 0                                       | 0                                                           | 1                                                          | 1                                             | 6/8         |
| Gao, 2015       | 1                                                                           | 1                                                               | 0                                                                 | 1                                                                                     | 0                                       | 0                                                           | 1                                                          | 1                                             | 5/8         |
| Hao, 2021       | 1                                                                           | 1                                                               | 1                                                                 | 0                                                                                     | 0                                       | 1                                                           | 1                                                          | 1                                             | 6/8         |
| Lin, 2020       | 1                                                                           | 1                                                               | 1                                                                 | 1                                                                                     | 1                                       | 1                                                           | 1                                                          | 1                                             | 8/8         |
| Peter, 2013     | 1                                                                           | 1                                                               | 1                                                                 | 1                                                                                     | 0                                       | 0                                                           | 0                                                          | 1                                             | 5/8         |
| Saito, 2014     | 1                                                                           | 1                                                               | 1                                                                 | 1                                                                                     | 0                                       | 0                                                           | 1                                                          | 1                                             | 6/8         |
| Xiao, 2018      | 0                                                                           | 1                                                               | 0                                                                 | 1                                                                                     | 0                                       | 0                                                           | 1                                                          | 1                                             | 4/8         |

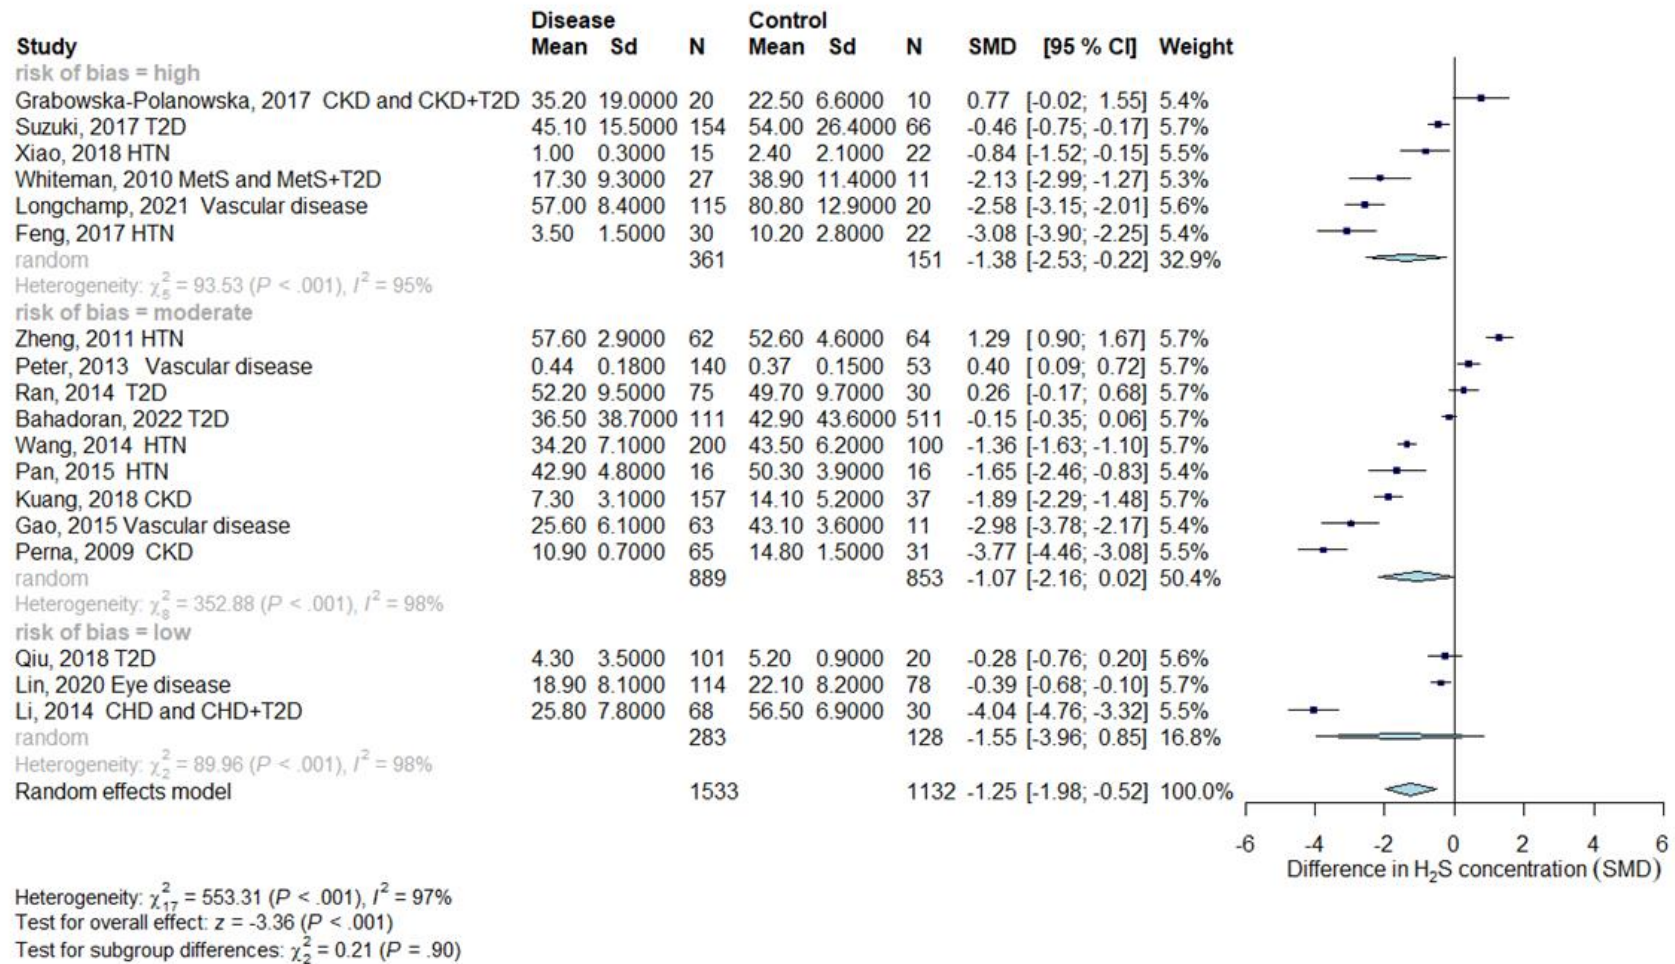

**Figure S1.** Forest plot with standardized mean differences (SMD) of circulating levels of H<sub>2</sub>S, stratified by risk of bias, in patients with chronic age-related diseases characterized by a gradual decrease in organ and tissue functions and low-grade inflammation compared with subjects without disease (control group). Abbreviations: CHD, chronic haemodialysis; CKD: chronic kidney disease; HTN, hypertension; MetS, metabolic syndrome; T2D: type 2 diabetes.

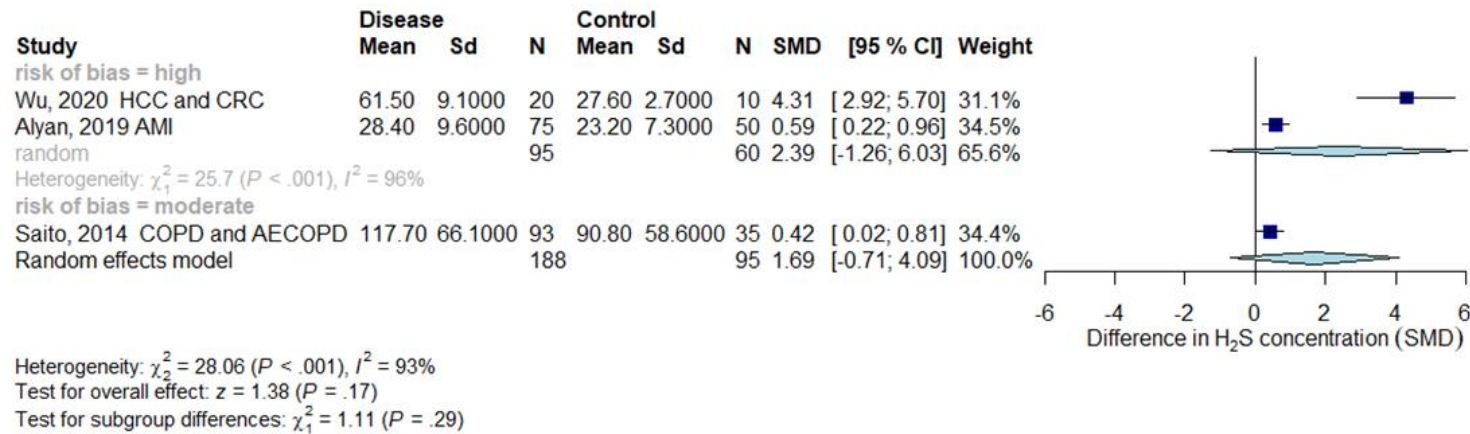

**Figure S2.** Forest plot with standardized mean differences (SMD) of circulating levels of H<sub>2</sub>S, stratified by risk of bias, in patients with age-related diseases characterized by acute inflammation (e.g., AMI), acute exacerbations of disease (e.g., COPD) or singular inflammatory profile (e.g., cancer) compared with subjects without disease (control group). Abbreviations: AE-COPD, acute exacerbation of chronic obstructive pulmonary disease; AMI: acute myocardial infarction; COPD, chronic obstructive pulmonary disease; CRC, colorectal cancer; HCC, hepatic cancer.
